# Supplementary material for: Novel alkali and alkaline earth metal coordination polymers based on 1,4-naphthalenedicarboxylic acid: synthesis, structural characterization and properties
Source: Royal Society of Chemistry journal article supplement (doi:10.1039/c3ce42208a), 2013-12-23
Supplement: c3ce42208a.pdf [file c3ce42208a.pdf]

## Supporting information

### **Novel Alkali and Alkaline Earth Metal Coordination Polymers Based on 1,4-Naphthalenedicarboxylic Acid: Synthesis, Structural Characterization and Properties**

Duraisamy Senthil Raja,<sup>a,b</sup> Jheng-Hong Luo,<sup>c</sup> Chun-Ting Yeh,<sup>b</sup> Yue-Chun Jiang,<sup>b</sup> Kuei-Fang Hsu,<sup>\*d</sup> and Chia-Her Lin<sup>\*b,c</sup>

<sup>a</sup>Department of Chemistry, National Tsing Hua University, Hsinchu 30013, Taiwan.

<sup>b</sup>Department of Chemistry, Chung Yuan Christian University, Chung-Li 32023, Taiwan.

<sup>c</sup>Master Program in Nanotechnology, Chung Yuan Christian University, Chung-Li 32023, Taiwan.

<sup>d</sup>Department of Chemistry, National Cheng Kung University, Tainan 701, Taiwan.

#### **Corresponding Authors:**

Prof. Dr. Kuei-Fang Hsu

E-mail: [hsukf@mail.ncku.edu.tw](mailto:hsukf@mail.ncku.edu.tw)

Prof. Dr. Chia-Her Lin

E-mail: [chiaher@cycu.edu.tw](mailto:chiaher@cycu.edu.tw)

Tel: +886-3-2653315

Fax: +886-3-2653399

#### **Contents**

Figure S1. Powder X-ray diffraction patterns of **1**.

Figure S2. Powder X-ray diffraction patterns of **2**.

Figure S3. Powder X-ray diffraction patterns of **3**.

Figure S4. Powder X-ray diffraction patterns of **4**.

Figure S5. Powder X-ray diffraction patterns of **5**.

Figure S6. Powder X-ray diffraction patterns of **6**.

Figure S7. The topological representation of compound **2-4**.

Figure S8. UV-vis absorption spectra for **1-6**.

Figure S9. Photoluminescence emission spectra for **1-6**.

Figure S10. PXRD patterns of **2** before and after gas sorption studies.

**Table S1.** Selected bond lengths (Å) for **1-6**.

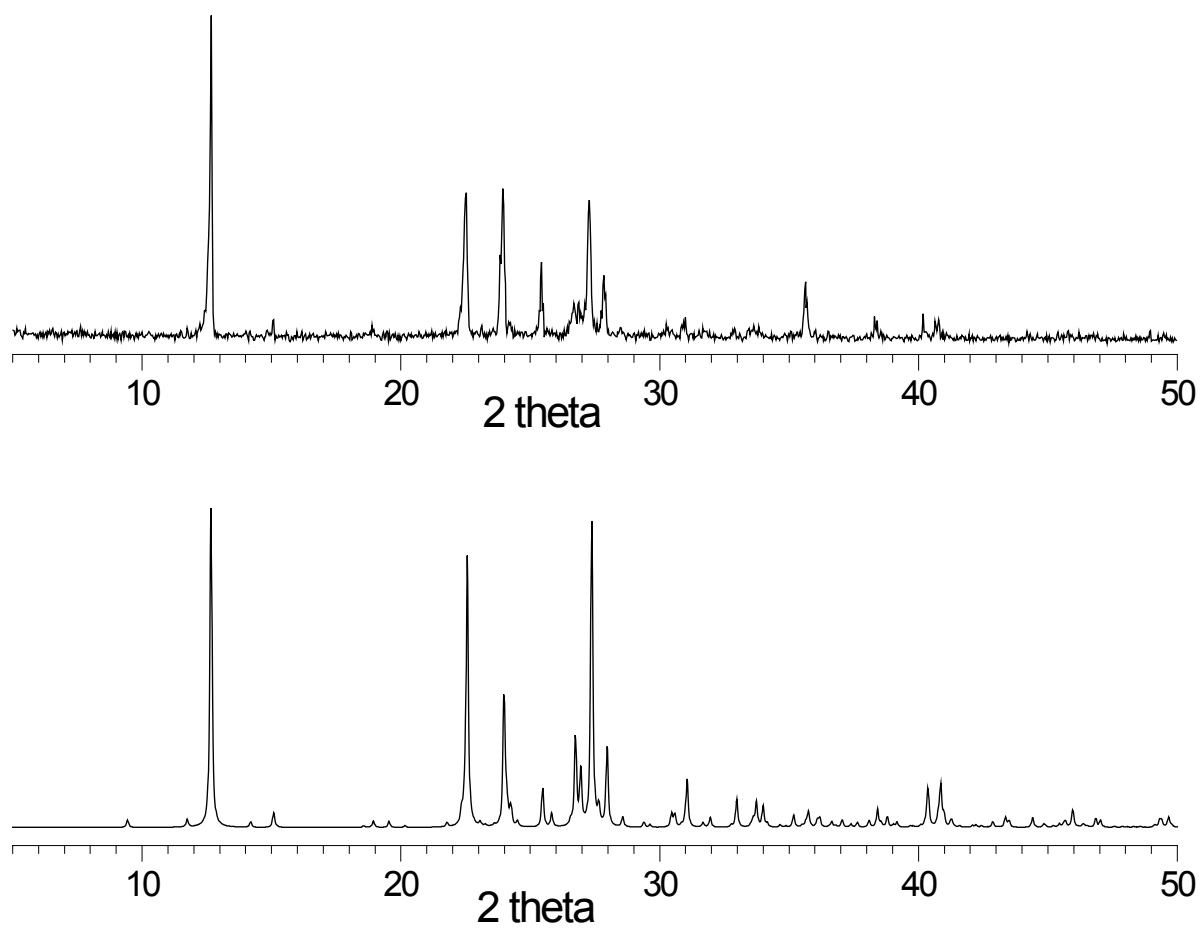

Figure S1. Powder XRD patterns of **1** (measured, top; calculated, bottom).

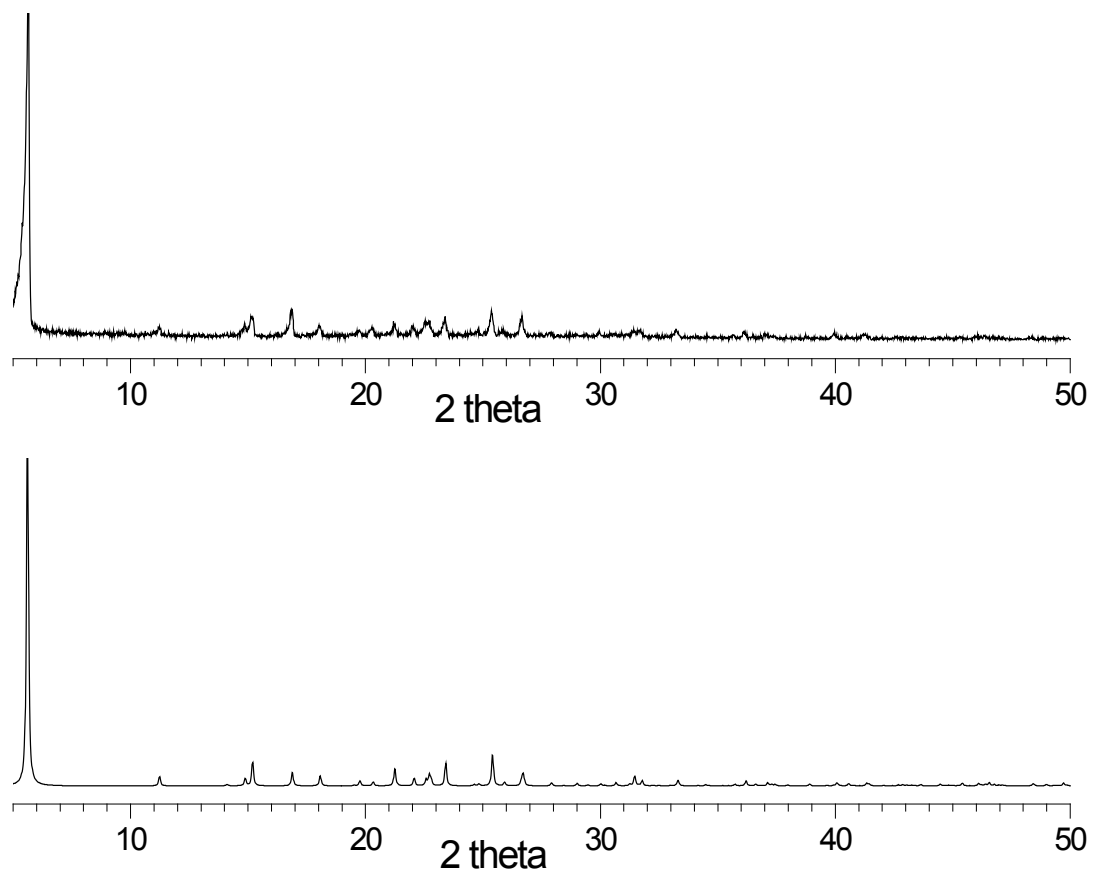

Figure S2. Powder XRD patterns of **2** (measured, top; calculated, bottom).

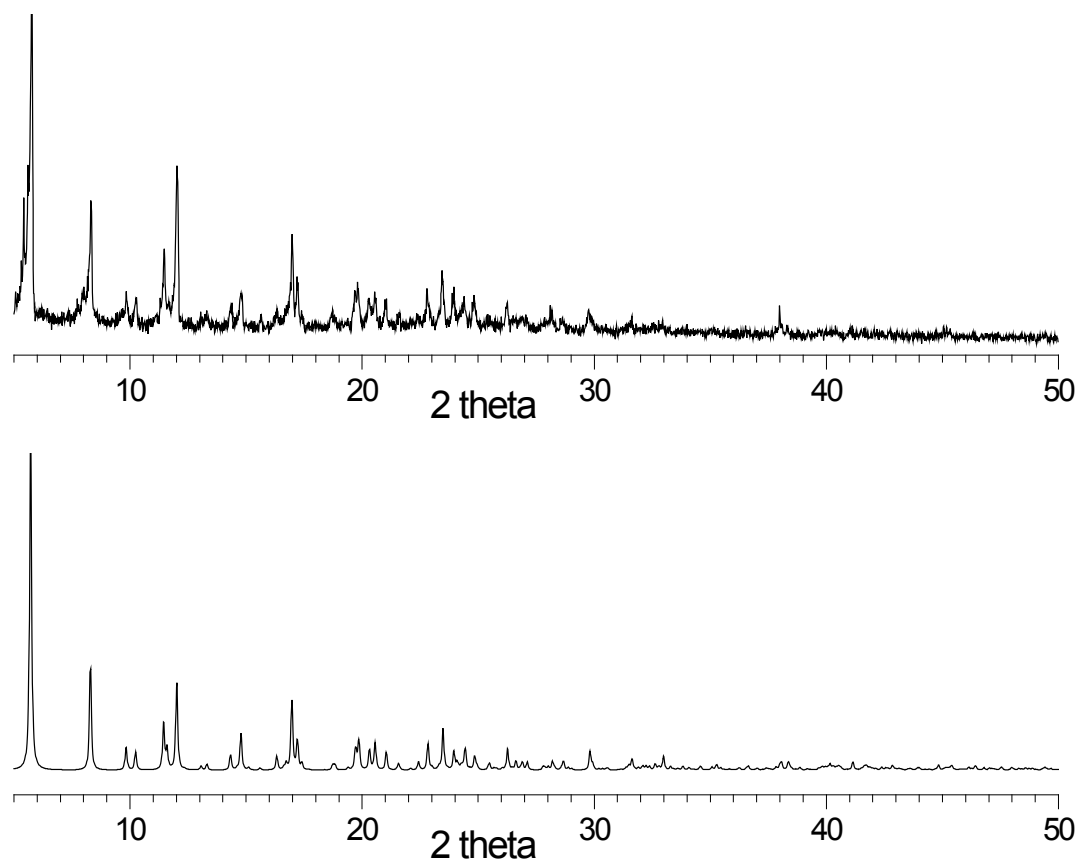

Figure S3. Powder XRD patterns of **3** (measured, top; calculated, bottom)

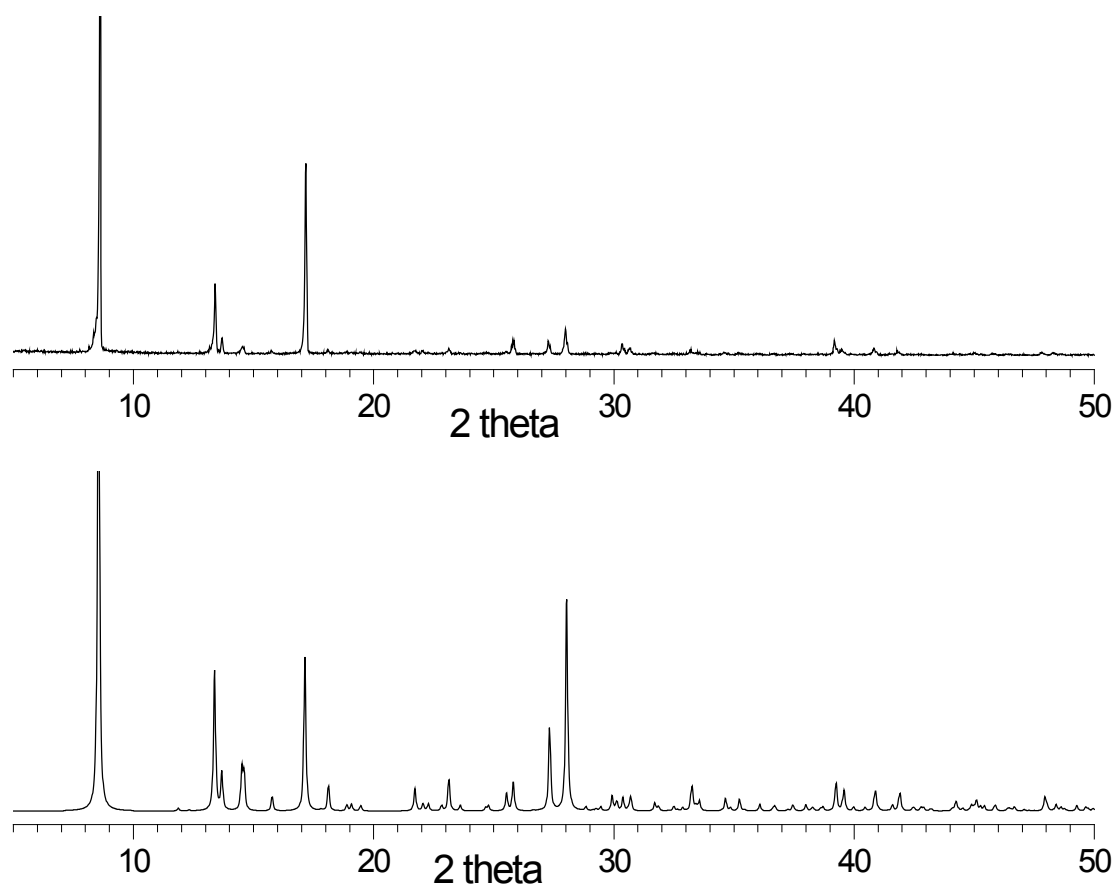

Figure S4. Powder XRD patterns of **4** (measured, top; calculated, bottom)

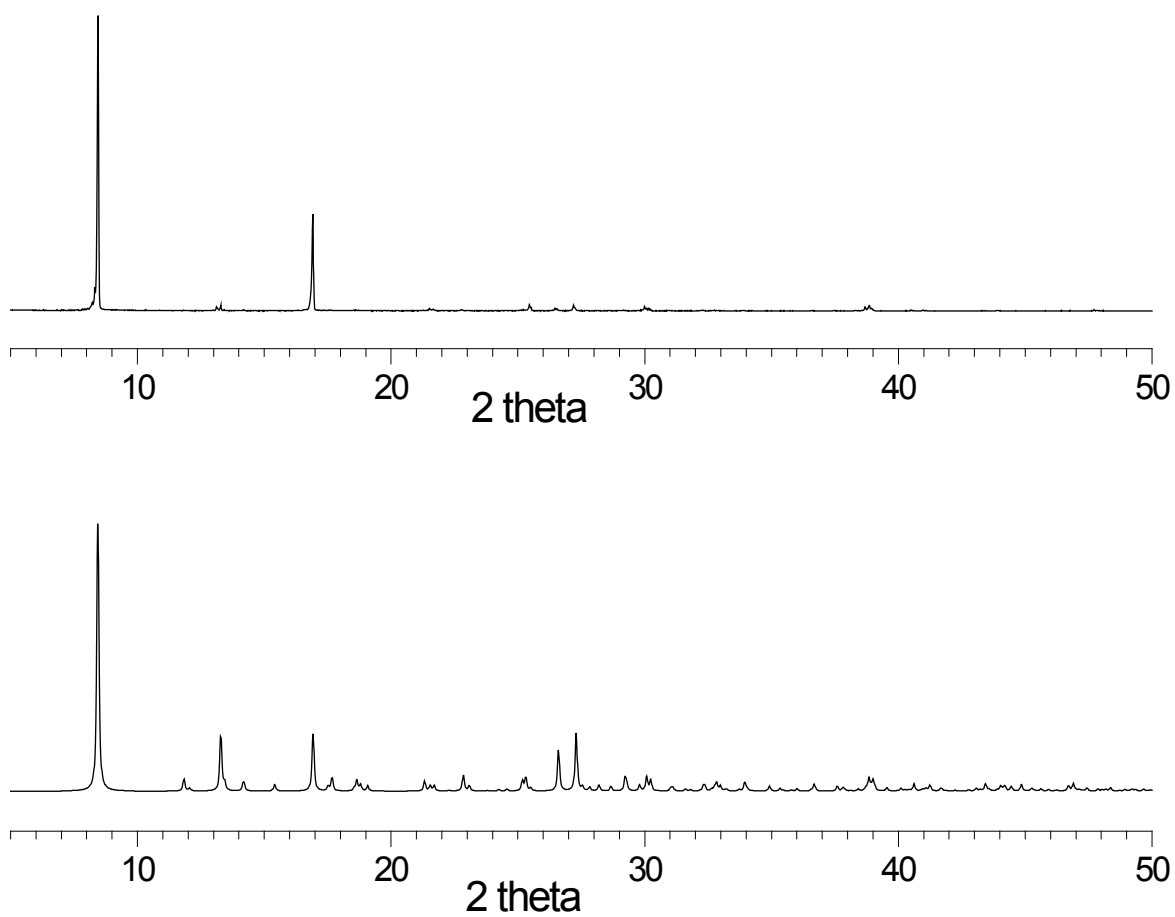

Figure S5. Powder XRD patterns of **5** (measured, top; calculated, bottom)

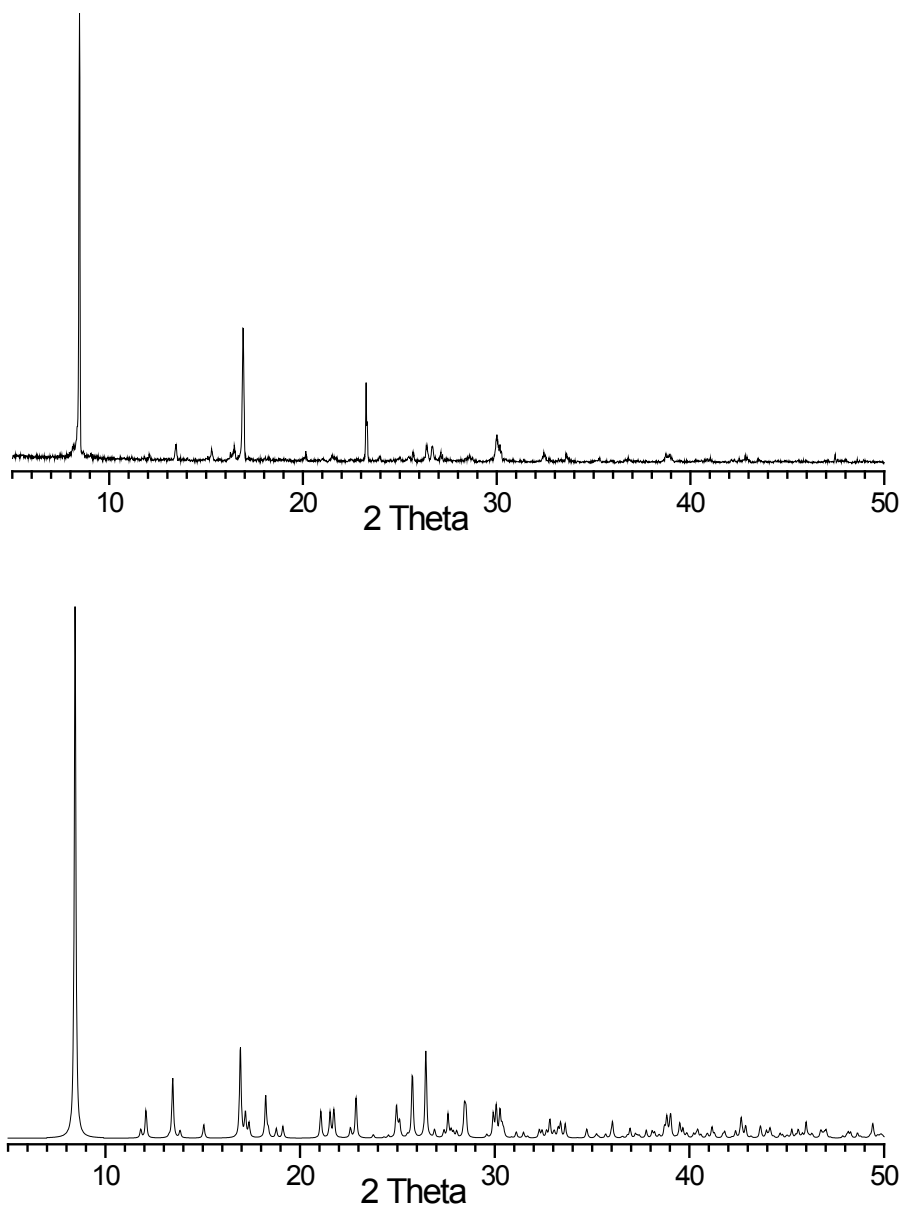

Figure S6. Powder XRD patterns of **6** (measured, top; calculated, bottom).

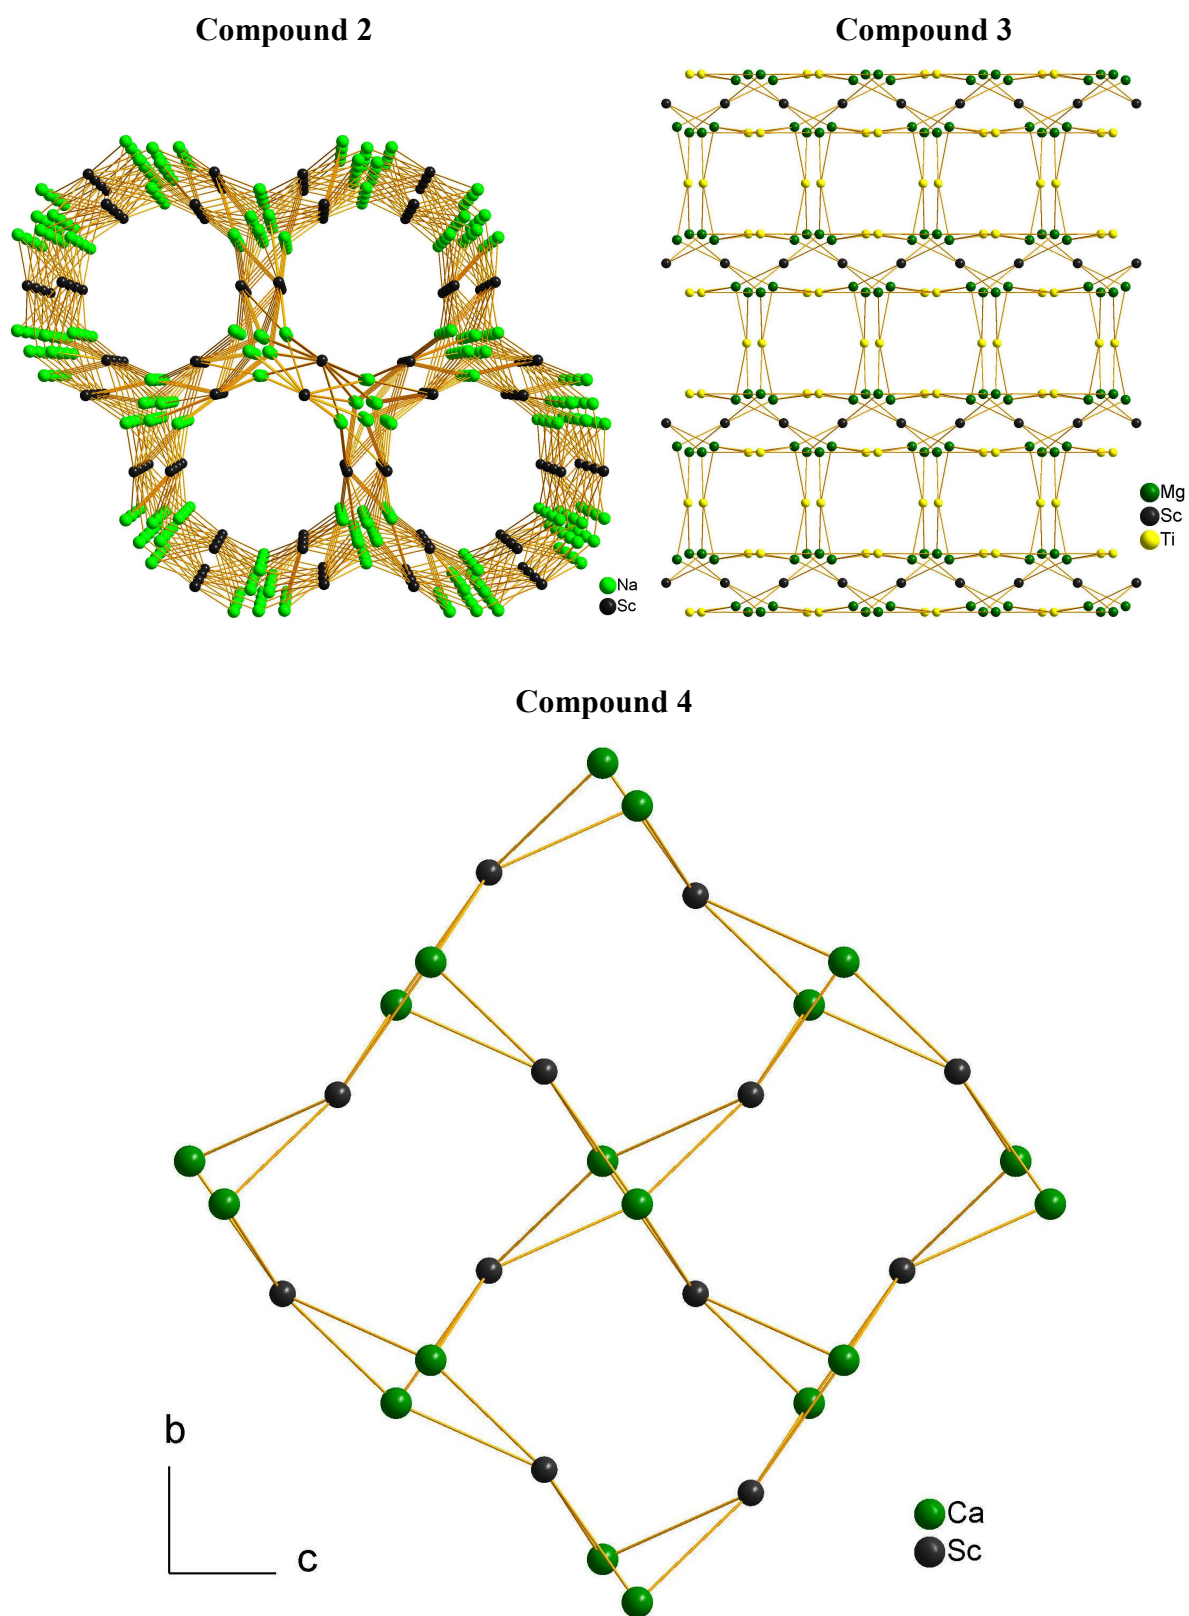

Figure S7. The topological representation of compound 2-4.



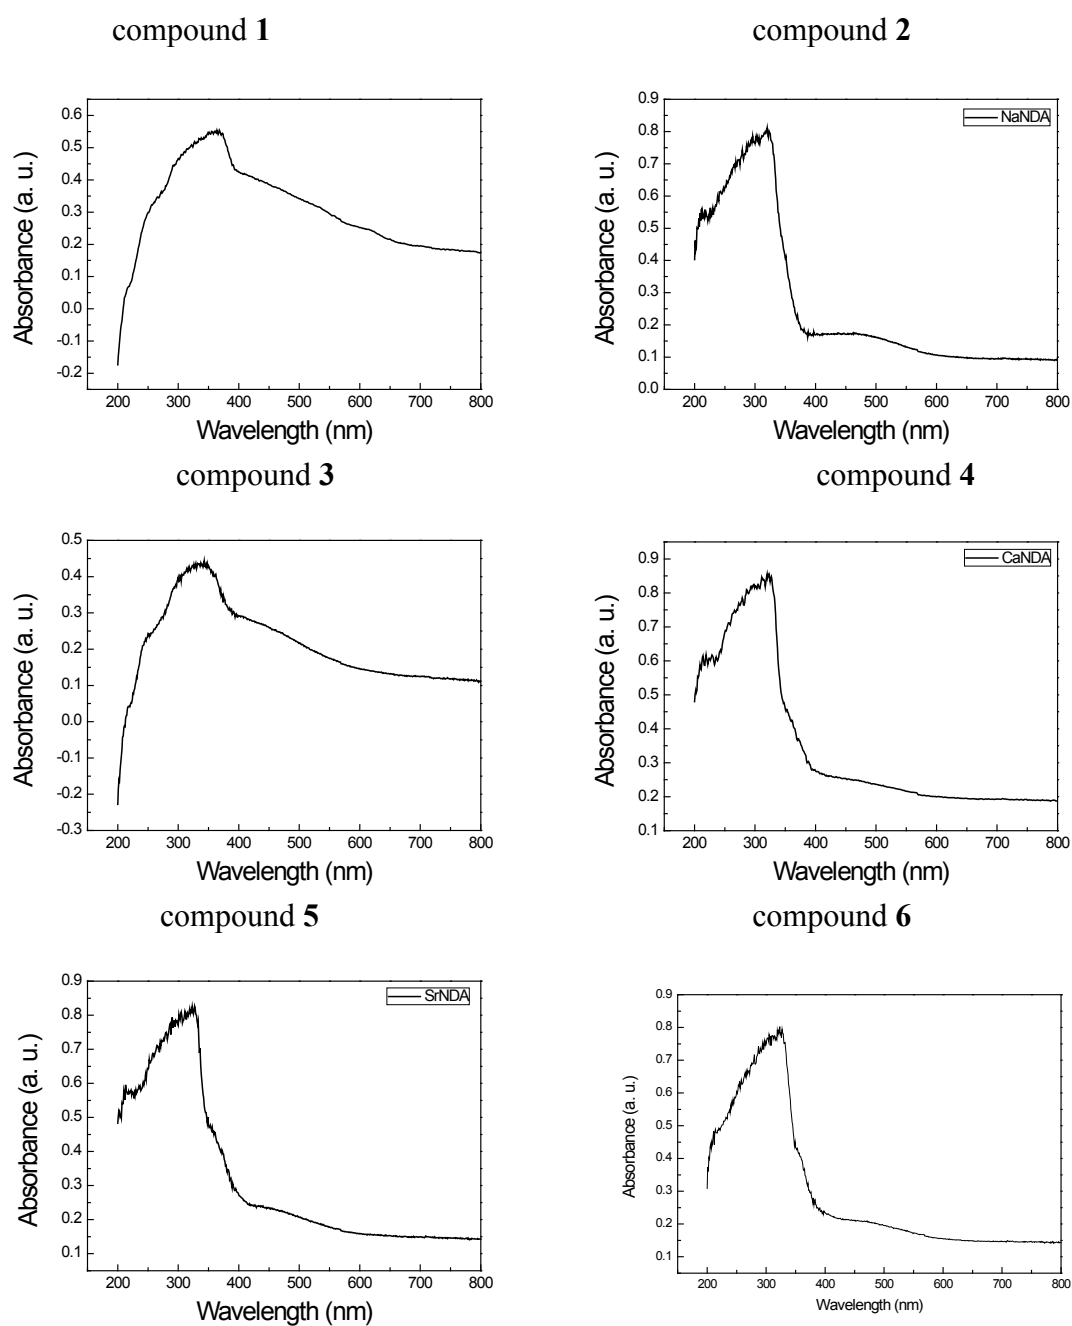

Figure S8. UV-vis absorption spectra for 1-6.

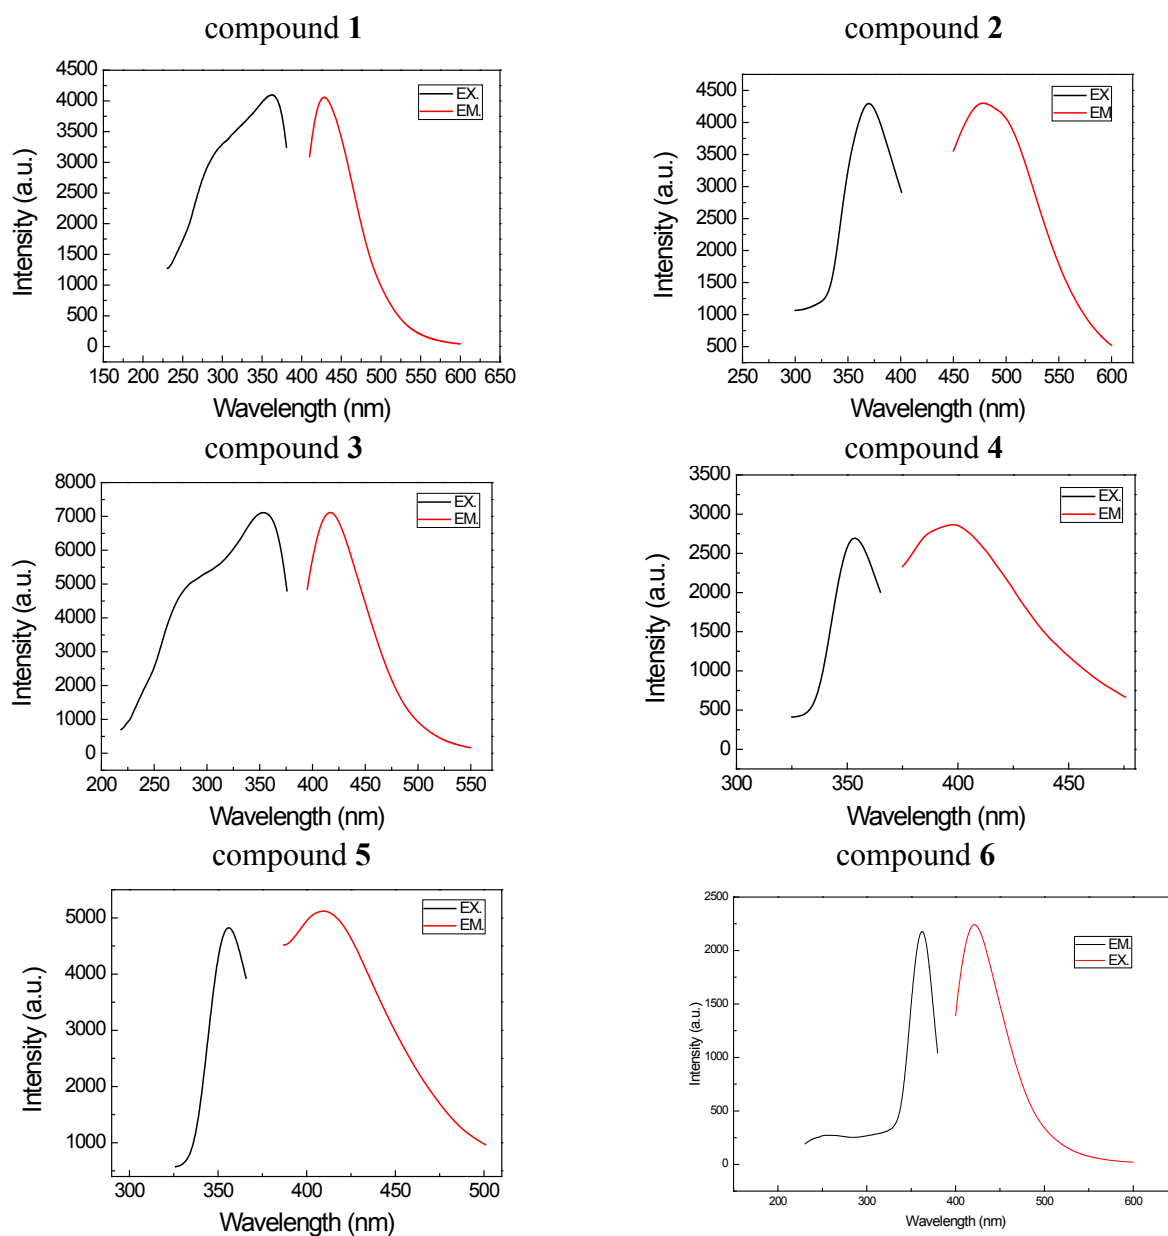

Figure S9. Photoluminescence emission spectra for 1-6.

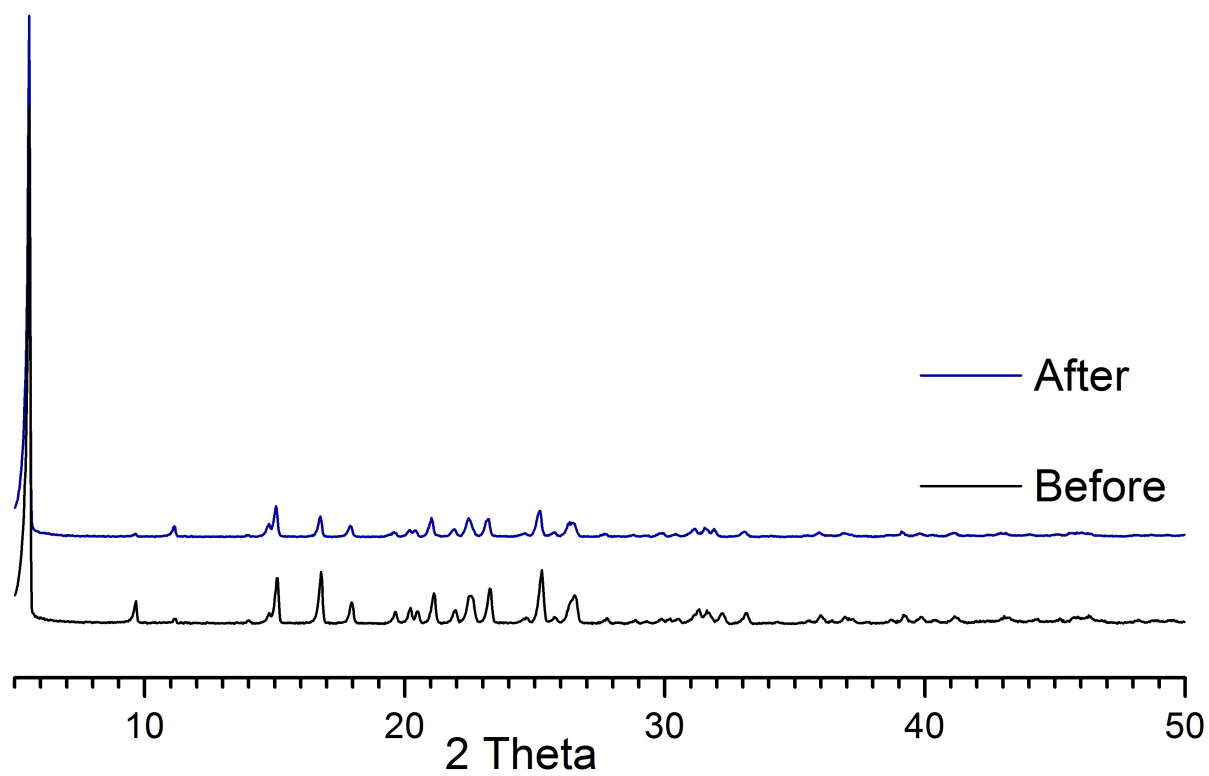

Figure S10. PXRD patterns of **2** before and after gas sorption studies.

**Table S1.** Selected bond lengths (Å) for **1-6**.

| <b>1</b>     |            |               |            |
|--------------|------------|---------------|------------|
| Li(1)-O(2W)  | 1.895(3)   | Li(1)-O(4)#1  | 1.934(3)   |
| Li(1)-O(1W)  | 1.903(3)   | Li(1)-O(1)    | 2.018(2)   |
| <b>2</b>     |            |               |            |
| Na(1)-O(4)#1 | 2.262(2)   | Na(2)-O(3)#3  | 2.302(2)   |
| Na(1)-O(2)#2 | 2.285(2)   | Na(2)-O(1)#6  | 2.341(2)   |
| Na(1)-O(4)#3 | 2.445(2)   | Na(2)-O(1S)   | 2.346(3)   |
| Na(1)-O(2)   | 2.508(2)   | Na(2)-O(2)#4  | 2.378(2)   |
| Na(1)-O(1)   | 2.547(2)   | Na(2)-O(4)#1  | 2.388(2)   |
| Na(1)-O(3)#3 | 2.635(2)   |               |            |
| <b>3</b>     |            |               |            |
| Mg(1)-O(4)   | 2.014(2)   | Mg(2)-O(7)    | 1.951(2)   |
| Mg(1)-O(3)   | 2.026(2)   | Mg(2)-O(8)    | 2.012(2)   |
| Mg(1)-O(2)   | 2.052(2)   | Mg(2)-O(5)    | 2.051(2)   |
| Mg(1)-O(1S)  | 2.073(2)   | Mg(2)-O(2W)   | 2.125(2)   |
| Mg(1)-O(1)   | 2.1029(19) | Mg(2)-O(6)    | 2.129(2)   |
| Mg(1)-O(1W)  | 2.144(2)   | Mg(2)-O(1)    | 2.2592(19) |
| <b>4</b>     |            |               |            |
| Ca(1)-O(1S)  | 2.2808(14) | Ca(1)-O(2)#4  | 2.4603(12) |
| Ca(1)-O(3)#1 | 2.3167(13) | Ca(1)-O(1)    | 2.4939(11) |
| Ca(1)-O(4)#2 | 2.3305(13) | Ca(1)-O(2)    | 2.5394(11) |
| Ca(1)-O(1)#3 | 2.4471(13) |               |            |
| <b>5</b>     |            |               |            |
| Sr(1)-O(1S)  | 2.435(3)   | Sr(1)-O(4) #4 | 2.5781(19) |
| Sr(1)-O(3)#1 | 2.463(2)   | Sr(1)-O(1)    | 2.644(2)   |
| Sr(1)-O(2)#2 | 2.474(3)   | Sr(1)-O(4)    | 2.677(2)   |
| Sr(1)-O(1)#3 | 2.559(2)   |               |            |
| <b>6</b>     |            |               |            |
| Ba(1)-O(1S)  | 2.634(3)   | Ba(1)-O(1)#4  | 2.754(3)   |
| Ba(1)-O(3)#1 | 2.642(3)   | Ba(1)-O(1)    | 2.812(2)   |
| Ba(1)-O(4)#2 | 2.665(3)   | Ba(1)-O(2)    | 2.825(2)   |
| Ba(1)-O(2)#3 | 2.690(3)   |               |            |

Symmetry transformations used to generate equivalent atoms: for complex **1**, #1  $-x+1, y+1/2, -z+3/2$ ; for complex **2**, #1  $y, -x+y+1, z+1/6$ , #2  $-y+1, x-y, z-1/3$ , #3  $x-y, x-1, z-1/6$ , #4  $-x+y+1, -x+1, z+1/3$ , #6  $-y+1, x-y, z+2/3$ , #7  $y+1, -x+y+1, z+1/6$ , #8  $x-y+1, x, z-1/6$ ; for complex **4**, #1  $-x+1/2, -y+1, z+1/2$ , #2  $-x, y-1/2, -z+1/2$ , #3  $x-1/2, -y+1/2, -z+1$ , #4  $x+1/2, -y+1/2, -z+1$ ; for complex **5**, #1  $-x-1/2, -y-1, z+1/2$ , #2  $-x, y-1/2, -z-3/2$ , #3  $x+1/2, -y-3/2, -z-1$ , #4  $x-1/2, -y-3/2, -z-1$ ; for complex **6**, #1  $-x+1/2, -y+1, z+1/2$ , #2  $-x, y+1/2, -z+1/2$ , #3  $x+1/2, -y+3/2, -z+1$ , #4  $x-1/2, -y+3/2, -z+1$ .
